# Supplementary material for: Hierarchical CoO/MnCo2O4.5 nanorod arrays on flexible carbon cloth as high-performance anode materials for lithium-ion batteries
Source: Royal Society of Chemistry journal article supplement (doi:10.1039/c7dt04686c), 2018-01-01
Supplement: c7dt04686c1.pdf [file c7dt04686c1.pdf]

## Supporting Information

### Hierarchical $\text{CoO}/\text{MnCo}_2\text{O}_{4.5}$ Nanorod Arrays on Flexible Carbon Cloth as High-Performance Anode Materials for Lithium-ion Batteries

Lianshan Ni,<sup>a</sup> Wei Tang,<sup>a</sup> Xiaohe Liu,<sup>\*a</sup> Ning Zhang,<sup>a</sup> Jun Wang,<sup>b</sup> Shuquan Liang,<sup>a</sup>  
Renzhi Ma,<sup>\*c</sup> Guanzhou Qiu<sup>b</sup>

<sup>a</sup> State Key Laboratory of Powder Metallurgy and School of Materials Science and Engineering, Central South University, Changsha, Hunan 410083, P. R. China

<sup>b</sup> School of Resources Processing and Bioengineering, Central South University, Changsha, Hunan 410083, P. R. China

<sup>c</sup> International Center for Materials Nanoarchitectonics (MANA), National Institute for Materials Science (NIMS), Namiki 1-1, Tsukuba, Ibaraki 305-0044, Japan.

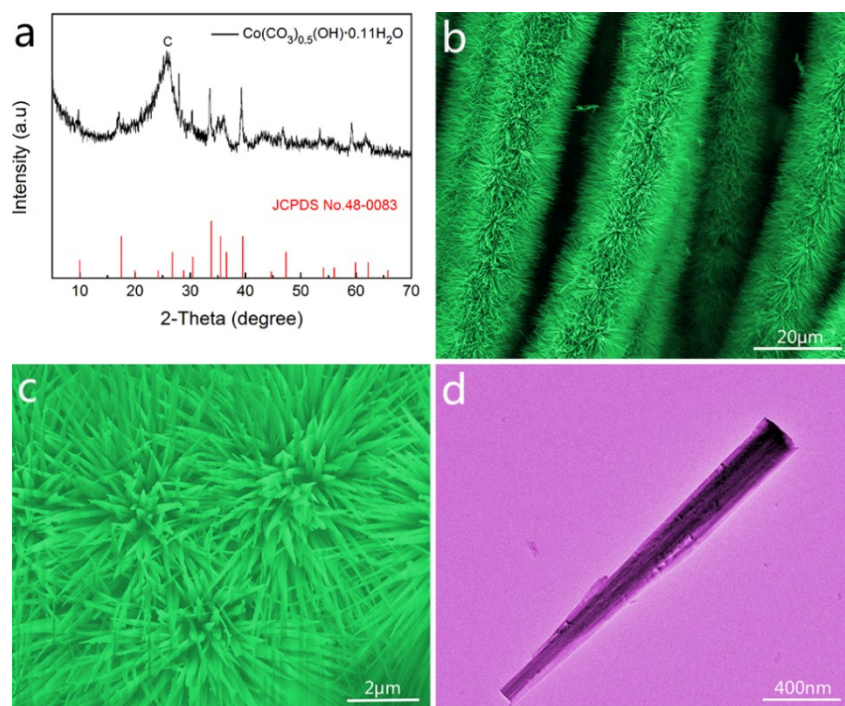

**Figure S1.** (a) XRD pattern, (b, c) SEM and TEM images of as-prepared  $\text{Co}(\text{CO}_3)_{0.5}(\text{OH})\cdot 0.11\text{H}_2\text{O}$  nanorods grown on the CC.

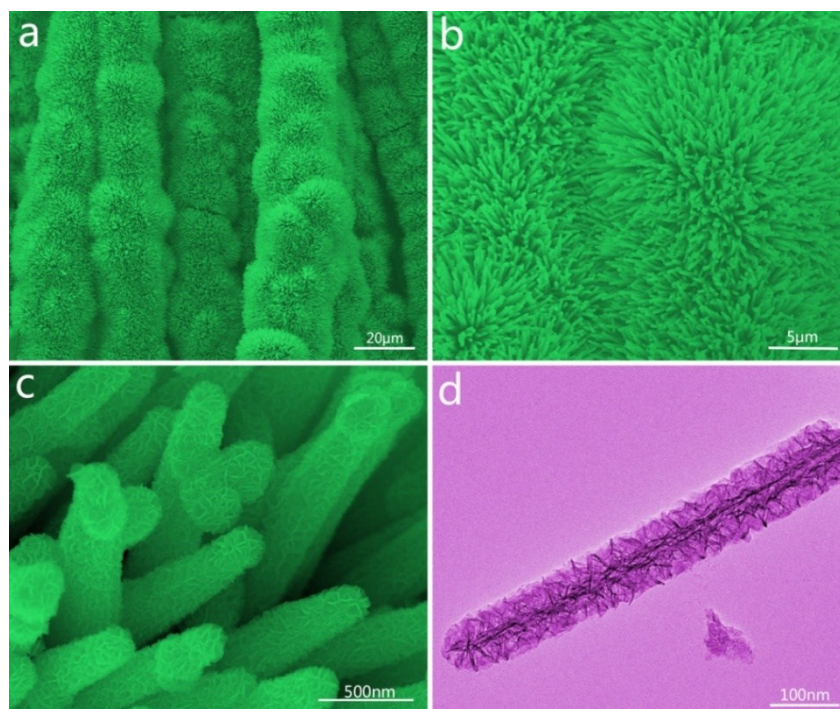

**Figure S2.** (a, b, c) SEM and (d) TEM images of the precursor grown on the CC.

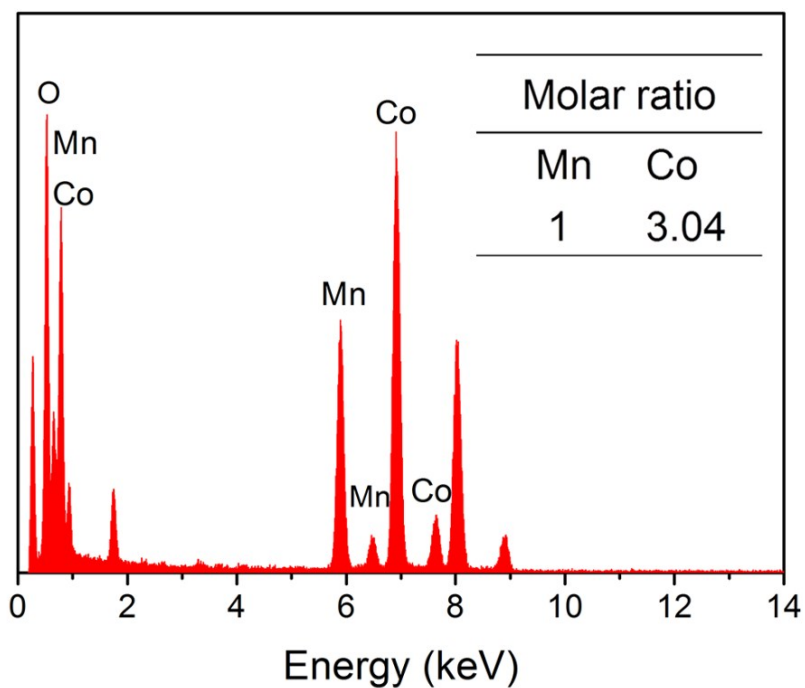

**Figure S3.** EDX spectroscopy of the hierarchical CoO/MnCo<sub>2</sub>O<sub>4.5</sub> nanorods grown on CC. Inset depicts the molar ratios of metal ions determined by ICP.

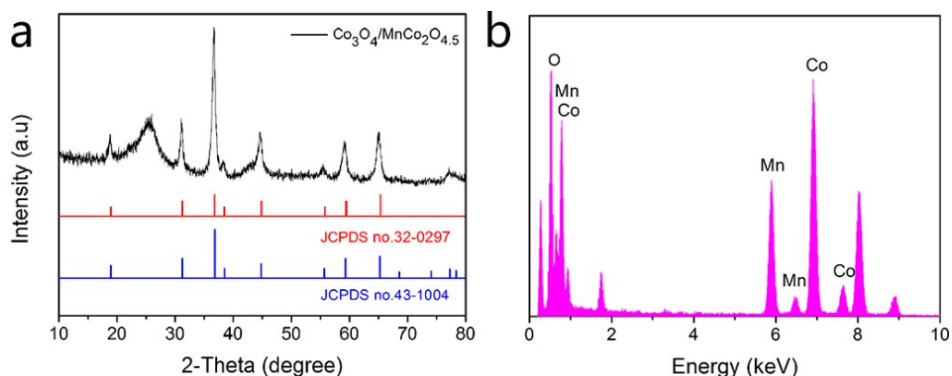

**Figure S4.** (a) XRD pattern and (b) EDX spectroscopy of the hierarchical  $\text{Co}_3\text{O}_4/\text{MnCo}_2\text{O}_{4.5}$  nanorods grown on CC.

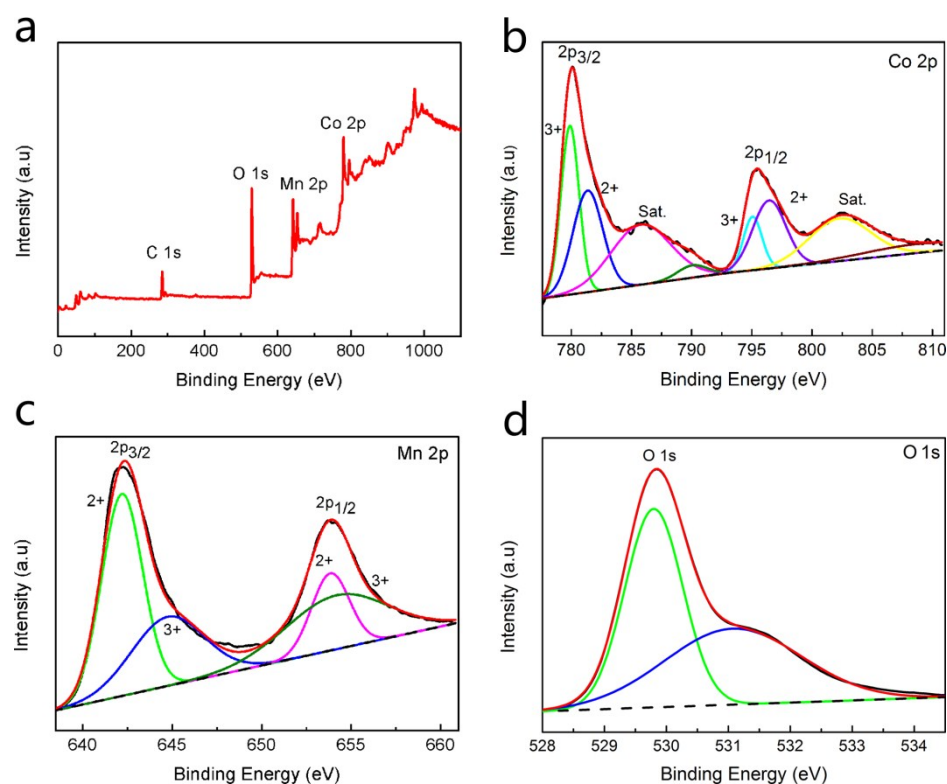

**Figure S5.** XPS spectra of as-prepared  $\text{Co}_3\text{O}_4/\text{MnCo}_2\text{O}_{4.5}$  product: (a) survey spectrum, (b) Co 2p, (c) Mn 2p and (d) O 1s.

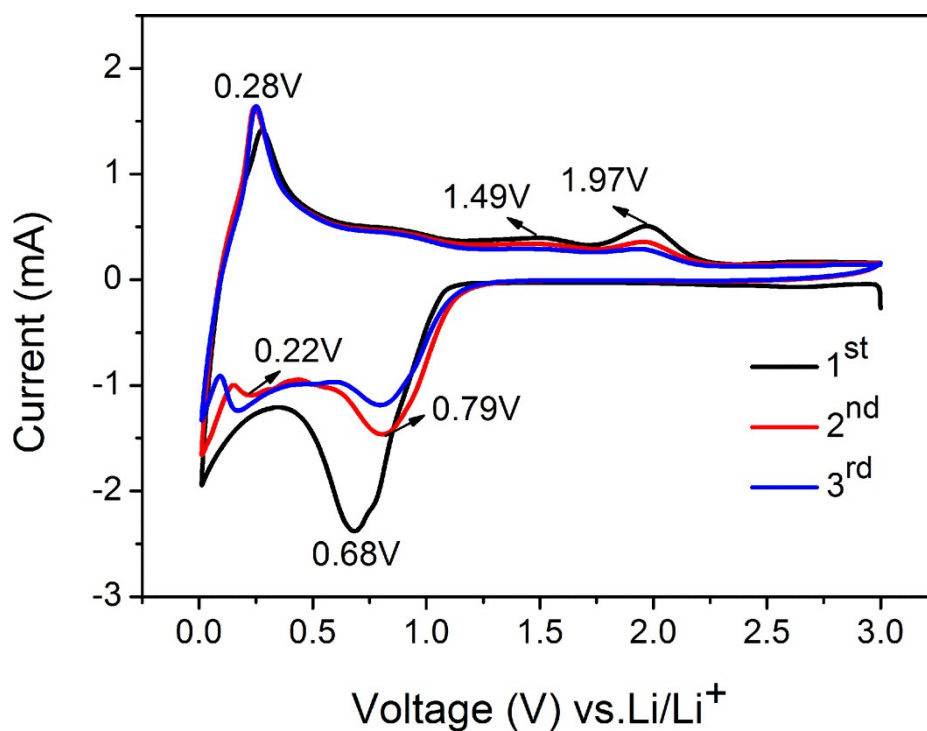

**Figure S6.** Cyclic voltammetry curves of the  $\text{Co}_3\text{O}_4/\text{MnCo}_2\text{O}_{4.5}$  electrode in a voltage range of 0.01-3.0 V at a scanning rate of  $0.1 \text{ mV s}^{-1}$ .

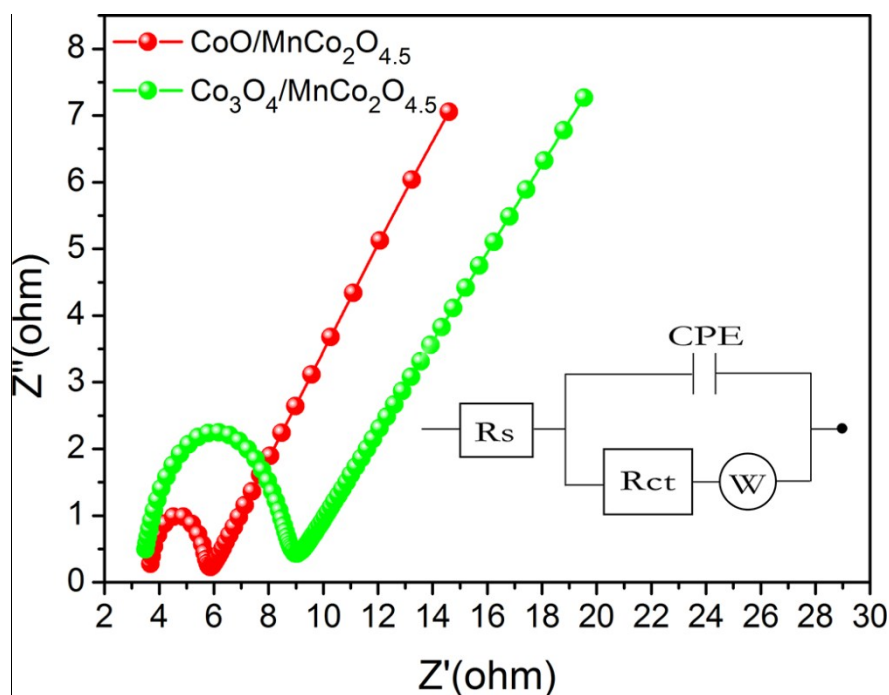

**Figure S7.** EIS plots of as-prepared  $\text{CoO}/\text{MnCo}_2\text{O}_{4.5}$  and  $\text{Co}_3\text{O}_4/\text{MnCo}_2\text{O}_{4.5}$  electrodes before test in the frequency range between 0.01 Hz and 100 kHz (inset shows the equivalent circuit diagram).

**Table S1.** Corresponding parameters that obtained from the Nyquist plots.

| electrode                                                          | $R_s(\Omega)$ | CPE1-T                | CPE1-P  | $R_{ct}(\Omega)$ | W1-R  | W1-T  | W1-P    |
|--------------------------------------------------------------------|---------------|-----------------------|---------|------------------|-------|-------|---------|
| CoO/MnCo <sub>2</sub> O <sub>4.5</sub>                             | 3.623         | 3.3025E <sup>-5</sup> | 0.96295 | 2.075            | 41.01 | 257.1 | 0.43099 |
| Co <sub>3</sub> O <sub>4</sub> /MnCo <sub>2</sub> O <sub>4.5</sub> | 3.368         | 2.587E <sup>-5</sup>  | 0.89026 | 5.253            | 48.79 | 520.9 | 0.37589 |
